# Supplementary material for: Structural Plasticity of Intrinsically Disordered LEA Proteins from Xerophyta schlechteri Provides Protection In Vitro and In Vivo
Source: Front Plant Sci. 2019 Oct 10;10:1272. doi: 10.3389/fpls.2019.01272 (PMC6798065; doi:10.3389/fpls.2019.01272)
Supplement: Supplementary file 2 [file Table_1.xlsx]

## Sheet: Supp.table1
Supplementary dataset 1 - Primers used for cloning of six XvLEAs	Supplementary table 1. Primers used for cloning of six XvLEAs.
Name	Gene ID	PFAM	Code	Forward primer (5'- 3')	Reverse primer (5'- 3')
XvDHN12	Xvis02_23544	pf00257	XsDHN12	ggggacaagtttgtacaaaaaagcaggctccATGGAGGGTTACGGGAACCACC	ggggaccactttgtacaagaaagctgggtgaattcTCAACGACGGCCAGGCAGGTT
XvLEA1-8	Xvis02_20008	pf03760	XsLEA1-8	ggggacaagtttgtacaaaaaagcaggctcacatATGCAGGCTGGAAGGGGCGCAATG	ggggaccactttgtacaagaaagctgggtcctaggTTAGAGTACATTGCGGTGGCCGACAC
XvLEA4-12	Xvis02_12059	pf02987	XsLEA4-8	ggggacaagtttgtacaaaaaagcaggctcacatATGGTGATGGCGGTGTCGG	ggggaccactttgtacaagaaagctgggtcctaggTTAGAGCTCATCCTCACTTCTAGAAC
XvLEA4-8	Xvis02_11331	pf02987	XsLEA4-12	ggggacaagtttgtacaaaaaagcaggctcacatATGGCCTCGACCCAGGACG	ggggaccactttgtacaagaaagctgggtcctaggTTACATCTGGGATTTGTTGTCGTCG
XvLEA6-2	Xvis02_08790	pf10714	XsLEA6-2	ggggacaagtttgtacaaaaaagcaggctccATGGAGCAGGGGAAAGCGAGG	ggggaccactttgtacaagaaagctgggtgaattcCTAATACCGGTCAGCGGCAAAGC
XvSMP4	Xvis02_06457	pf04927	XsSMP4	ggggacaagtttgtacaaaaaagcaggctcacatATGAGCCAGGAGCAGCCCC	ggggaccactttgtacaagaaagctgggtcctaggCTACACCGCCGGATCGCC
Primersequences. Gene-specific part in upper case, flanking Gateway attachment and restriction enzyme sites in lower caps. Attachment sites in red, restriction sites underscored and colored. NdeI, orange; NcoI, blue; EcoRI, purple; and AvrII, green.

## Sheet: Supp.table2
Supplementary table 2. Primers used for RT-qPCR and Ct values
Gene list	AGI	Primers	Sequence	lenght	Tm	frag_size_bp	position
XsLEA-8	Xvis02_20008	qPCR2-F	AGTCAACATCTCACCACCC	19	58.44	122	ex2
XsLEA1-8	Xvis02_20008	qPCR2-R	ATTCACCCTCTCAGCTGC	18	58.36	122	ex2
	Genotype_replicate	Ct value
Ref_gene_At4g12590	Col0_R1	24.8733
	Col1_R2	24.7434
	Col2_R3	24.7772
	D3_R1	24.7481
	D3_R2	24.574
	D3_R3	25.0855
	D4_R1	25.6645
	D4_R2	25.6365
	D4_R3	25.7117
	D6_R1	24.5533
	D6_R2	24.8204
	D6_R3	24.6498
	D7_R1	24.6121
	D7_R2	24.4778
	D7_R3	24.5633
	D8_R1	24.6355
	D8_R2	24.5734
	D8_R3	24.313
Ref_gene2_At4g34270	Col0_R1	23.3152
	Col1_R2	23.2178
	Col2_R3	23.3757
	D3_R1	23.1511
	D3_R2	23.1451
	D3_R3	23.2298
	D4_R1	23.8615
	D4_R2	24.0143
	D4_R3	24.2337
	D6_R1	23.2339
	D6_R2	23.2666
	D6_R3	23.5573
	D7_R1	23.2799
	D7_R2	23.2572
	D7_R3	23.3063
	D8_R1	23.1178
	D8_R2	23.0673
	D8_R3	23.3295
XsLEA1-8	Col0_R1	32.6034
	Col1_R2	32.073
	Col2_R3	31.8839
	D3_R1	19.285
	D3_R2	19.1412
	D3_R3	19.1695
	D4_R1	19.8596
	D4_R2	19.7857
	D4_R3	19.8831
	D6_R1	18.9517
	D6_R2	19.153
	D6_R3	19.3164
	D7_R1	18.717
	D7_R2	18.6749
	D7_R3	18.9126
	D8_R1	19.1658
	D8_R2	19.1158
	D8_R3	19.2683

## Sheet: Supp.table3
Supplementary table 3. Amino acid abundance of XsLEAs
		XsDHN12	XsLEA1-8	XsLEA4-8	XsLEA4-12	XsLEA6-2	XsSMP4
Aminoacid (%)	% Polar (D+E+H+K+N+Q+R+S+T+Z)	57.724	52.83	64.384	59.946	50.98	47.213
	% Non-polar (A+C+F+G+I+L+M+P+V+W+Y)	42.276	47.17	35.616	40.054	49.02	52.787
Abundace (%)	Ala(A)	-	0.217	0.123	0.254	0.078	0.151
	Lys(K)	0.098	0.094	0.137	0.147	-	-
	Gln(Q)	0.081	-	0.11	-	0.088	0.079
	Glu(E)	-	0.104	-	0.097	0.098	0.092
	Gly(G)	0.138	0.142	0.103	-	0.127	-

## Sheet: Supp.table4
Supplementary table 4. Biochemical characteistics of XsLEAs
Name	Phase Plot Annotation	Disordered Binding Regions (DBRs)	MoRF regions (≥5 residues)	%Phosporilated
XsDHN12	Boundary Region	3	2	10.5691
XsLEA1-8	Boundary Region	1	1	9.80392
XsLEA4-8	Boundary Region	5	0	13.2075
XsLEA4-12	Coils,Hairpins and Chimeras	7	1	20.6806
XsLEA6-2	Boundary Region	2	2	6.16438
XsSMP4	Globule/Tadpole	8	3	3.60656

## Sheet: Supp.table5
Supplementary table 5. Predicted subcellular localization of XsLEAs using different prediction softwares
	Subcellular localization			Signal Peptide
	PSI	Plant-mPLoc	CELLO2GO	SignalP4.1	TargetP1.1	PrediSi
XsDHN12	C/N	N	N	no	no	no
XsLEA1-8	C	N	C/N	no	no	no
XsLEA4-8	C/P	CW/N	N	no	no	no
XsLEA4-12	C	CW	N	no	no	no
XsLEA6-2	C	N	C/N	no	no	no
XsSMP4	C	N	C	no	no	no
	P:Plastids
	C:Cytoplasmic
	N:Nucleous
	CW:Cell Wall
	M:Mitochondia
